# Supplementary material for: The State of the Blood–Aqeous Barrier During Anti-Angiogenic Therapy in Patients with Exudative Age-Related Macular Degeneration
Source: Research Square preprint supplement (doi:10.21203/rs.3.rs-8626646/v1), 2026-02-10
Supplement: Supplementary file 1 [file e57a37c5ee11d8ba3dbf4148.docx]

| Section/Topic | Item | Reported in Manuscript |
| --- | --- | --- |
| Title and abstract | 1a | Title indicates study is randomized; Abstract structured with Purpose, Materials and Methods, Results, Conclusions. |
|  | 1b | Abstract provides structured summary including trial design, interventions, outcomes, and results. |
| Introduction | 2a | Background and rationale: Introduction section. |
|  | 2b | Specific objectives or hypotheses: Purpose stated in Abstract and Methods section. |
| Methods: Trial design | 3a | Study design: Prospective, randomized, comparative, interventional, single-center, pilot study (Methods, first paragraph). |
|  | 3b | Changes to methods after trial commencement: N/A. |
| Participants | 4a | Eligibility criteria: Methods, Inclusion and Exclusion criteria. |
|  | 4b | Settings and locations: Filatov Institute of Eye Diseases and Tissue Therapy, Ukraine. |
| Interventions | 5 | Detailed description of interventions: Methods section (aflibercept 2 mg/0.05 mL, brolucizumab 6 mg/0.05 mL, treat-and-extend regimen). |
| Outcomes | 6a | Primary and secondary outcome measures: Methods (laser flare photometry as an indirect measure of blood–aqueous barrier); Abstract Results. |
|  | 6b | Any changes to outcomes after trial commencement: N/A. |
| Sample size | 7a | Number of participants: 30 patients (33 eyes), Methods section. |
|  | 7b | How sample size was determined: Pilot study; sample size based on feasibility and not powered for formal hypothesis testing. |
| Randomization: sequence generation | 8a | Method used to generate random sequence: Computer-generated random sequence. |
| Randomization: type | 8b | Type of randomization: Simple randomization (1:1 ratio, computer-generated). |
| Allocation concealment mechanism | 9 | Sequentially numbered, opaque, sealed envelopes used to conceal allocation. |
| Implementation | 10 | Random sequence generated by an independent researcher; participants enrolled and assigned by study investigators. |
| Blinding | 11a | Open-label study (participants and personnel not blinded). |
|  | 11b | Outcome assessors were masked to group allocation. |
| Statistical methods | 12a | Statistical methods for primary and secondary outcomes: Methods section; median, p-values reported, and 95% confidence where applicable. |
|  | 12b | Methods for additional analyses: N/A. |
| Results: participant flow | 13a | Numbers randomly assigned, received intervention, analyzed for primary outcome: Results section. |
|  | 13b | Losses and exclusions after randomization: N/A (all patients completed follow-up). |
| Recruitment | 14a | Dates defining recruitment and follow-up: Recruitment Jan 2022 – Jun 2022; follow-up Jun 2022 – Dec 2022. |
|  | 14b | Why trial ended or stopped: Trial completed as per protocol. |
| Baseline data | 15 | Baseline demographic and clinical characteristics: Table 1. |
| Numbers analyzed | 16 | Number of participants analyzed per group for each outcome: Results section. |
| Outcomes and estimation | 17a | Results for each primary and secondary outcome with effect sizes: Abstract Results, Results section; laser flare photometry, BCVA, and central retinal thickness reported per group. |
|  | 17b | Effect size and precision: P-values and 95% confidence intervals reported. |
| Ancillary analyses | 18 | Subgroup or adjusted analyses: N/A. |
| Harms | 19 | Adverse events: No significant adverse events reported; Results section. |
| Discussion: limitations | 20 | Limitations of the trial: Small sample, short follow-up, pilot design, laser flare photometry as indirect marker; Discussion section. |
|  | 21 | Generalizability of trial findings: Discussion section. |
|  | 22 | Interpretation consistent with results: Discussion section. |
| Other information | 23 | Registration number: Clinical trial registration NCT07375901 (retrospectively registered). |
|  | 24 | Protocol access: Approved by Ethics Committee; Methods section. |
|  | 25 | Funding: No funding; Authors’ contributions and Competing interests declared. |
| Ethics and Consent | – | All participants provided written informed consent; Ethics approval: Ethics Committee of SI “The Filatov Institute of Eye Diseases and Tissue Therapy of the NAMS of Ukraine” (approval number: 4), in compliance with the Declaration of Helsinki; Consent for publication: Not applicable. |
| Availability of data and materials | – | Data are available upon reasonable request to the author. |
| Competing interests | – | The authors declare no competing interests. |
| Authors’ contributions | – | Study concept and design: KT, AK; Data collection and analysis: KT, IN, TK, AK, LG; Manuscript preparation: KT, TK, OZ, OD; All authors reviewed and approved the final version of the manuscript. |
